# Supplementary material for: [FeFe]-hydrogenase maturation: H-cluster assembly intermediates tracked by electron paramagnetic resonance, infrared, and X-ray absorption spectroscopy
Source: PubMed Central journal article supplement (PMC7399679; doi:10.1007/s00775-020-01799-8), 2020-07-13
Supplement: 775_2020_1799_MOESM1_ESM.pdf [file 775_2020_1799_MOESM1_ESM.pdf]

# Supporting Information

## **[FeFe]-hydrogenase maturation: H-cluster assembly intermediates tracked by electron paramagnetic resonance, infrared, and X-ray absorption spectroscopy**

Brigitta Németh<sup>1, ‡</sup>, Moritz Senger<sup>2, ‡ ‡</sup>, Holly J. Redman<sup>1</sup>, Pierre Ceccaldi<sup>1</sup>, Joan Broderick<sup>3</sup>, Ann Magnuson<sup>1</sup>, Sven T. Stripp<sup>2</sup>, Michael Haumann<sup>4</sup>, and Gustav Berggren<sup>1, ✉</sup>

<sup>1</sup>Department of Chemistry – Ångström Laboratory, Molecular Biomimetics, Uppsala University, 75120 Uppsala, Sweden

<sup>2</sup>Physics Department, Molecular Biophysics, Freie Universität Berlin, 14195 Berlin, Germany

<sup>3</sup>Department of Chemistry and Biochemistry, Montana State University, Bozeman, Montana 59717, USA.

<sup>4</sup>Physics Department, Biophysics of Metalloenzymes, Freie Universität Berlin, 14195 Berlin, Germany

<sup>‡</sup> Current address Department of Chemistry and Biochemistry, Montana State University, Bozeman, Montana 59717, USA.

<sup>‡ ‡</sup> Current address Department of Chemistry – Ångström Laboratory, Physical Chemistry, Uppsala University, 75120 Uppsala, Sweden

<sup>✉</sup>Correspondence to: [gustav.berggren@kemi.uu.se](mailto:gustav.berggren@kemi.uu.se)

## Table of Contents

|                                                                                                |   |
|------------------------------------------------------------------------------------------------|---|
| Kinetic simulations.....                                                                       | 3 |
| Table S1: EXAFS simulation parameters. ....                                                    | 4 |
| Fig. S1. Overview of simulated and experimental EPR spectra .....                              | 5 |
| Fig. S2. Protein film hydration monitored by ATR FTIR spectroscopy.....                        | 6 |
| Fig. S3. Influence of the $[2\text{Fe}]^{\text{adt}}$ concentration on H-cluster assembly..... | 6 |
| Fig. S4. H-cluster assembly under reducing conditions.....                                     | 7 |
| Fig. S5. Effect of reductant on H-cluster assembly (comparison). ....                          | 7 |
| Fig. S6. Fe XAS spectra of apo-HydA1/ $[2\text{Fe}]^{\text{adt}}$ mixtures.....                | 8 |
| References .....                                                                               | 8 |

## Kinetic simulations

Time courses of parameters from XAS were simulated on the basis of a consecutive 3-step reaction scheme (Eq. 1) and using Eq. S1 (Y1-4, scaling factors) for description of the formation of states C (i.e., **Hox-CO**) and D (i.e., **Hox**), with the respective time constants ( $\tau$ ) given in the text corresponding to the inverted rate constants ( $\tau_i = k_i^{-1}$ ):

(S1)

$$A(t) = Y1 \exp\left(\frac{-k1}{t}\right)$$

$$B(t) = Y2 \left[ \frac{k1}{(k2-k1)} \exp\left(\frac{-k1}{t}\right) + \frac{k1}{(k1-k2)} \exp\left(\frac{-k2}{t}\right) \right]$$

$$C(t) = Y3 \left[ \frac{k1k2}{(k2-k1)(k3-k1)} \exp\left(\frac{-k1}{t}\right) + \frac{k1k2}{(k1-k2)(k3-k2)} \exp\left(\frac{-k2}{t}\right) + \frac{k1k2}{(k1-k3)(k2-k3)} \exp\left(\frac{-k3}{t}\right) \right]$$

$$D(t) = Y4 \left\{ \frac{k1k2}{(k2-k1)(k3-k1)} \left[ 1 - \exp\left(\frac{-k1}{t}\right) \right] + \frac{k1k2}{(k1-k2)(k3-k2)} \left[ 1 - \exp\left(\frac{-k2}{t}\right) \right] + \frac{k1k2}{(k1-k3)(k2-k3)} \left[ 1 - \exp\left(\frac{-k3}{t}\right) \right] \right\}$$

In the XAS data simulations it was assumed that species C and D were visible simultaneously in the data so that the sum of the C(t) and D(t) terms was included with individual scaling factors Y3 and Y4.

**Table S1:** EXAFS simulation parameters.<sup>a</sup>

| sample                                      | Fe-C(-N/O)                                                                                                                                                                                                                   | Fe-S                   | Fe-Fe                                             | R <sub>F</sub><br>[%] |
|---------------------------------------------|------------------------------------------------------------------------------------------------------------------------------------------------------------------------------------------------------------------------------|------------------------|---------------------------------------------------|-----------------------|
|                                             | N [per Fe] / R [Å] / 2σ <sup>2</sup> x10 <sup>3</sup> [Å <sup>2</sup> ]                                                                                                                                                      |                        |                                                   |                       |
| [2Fe] <sup>adt</sup>                        | 2.0* / 1.81 (1.76) / 3 <sup>&amp;</sup><br>2.0* / 2.75 / 3 <sup>&amp;</sup><br>2.0* / 1.42 / 8 <sup>§#</sup><br>1.0* / 2.02 (1.94) / 3 <sup>&amp;</sup><br>1.0* / 2.98 / 3 <sup>&amp;</sup><br>1.0* / 1.57 / 8 <sup>§#</sup> | 2.0* / 2.29 (2.28) / 3 | 1.0* / 2.51 (2.51) / 3                            | 14.2                  |
| apo-HydA1                                   | -                                                                                                                                                                                                                            | 4.1 / 2.29 (2.28) / 7  | 2.8 / 2.72 (2.72) / 10                            | 13.5                  |
| apo-HydA1<br>+ [2Fe] <sup>adt</sup><br>mean | 1.0* / 1.87 (1.86) / 5*<br>1.0* / 2.97 / 5*<br>1.0* / 1.34 / 5* <sup>#</sup>                                                                                                                                                 | 3.3* / 2.29 (2.30) / 6 | 0.3* / 2.52 (2.55) / 2*<br>2.0* / 2.71 (2.69) / 9 | 10.5                  |
| 32 s <sup>b</sup>                           | 1.0* / 1.86 / 5*<br>1.0* / 2.98 / 5*<br>1.0* / 1.07 / 5* <sup>#</sup>                                                                                                                                                        | 3.3* / 2.28 / 7        | 0.3* / 2.47 / 2*<br>2.0* / 2.72 / 12              | 14.1                  |
| 51 s <sup>b</sup>                           | 1.0* / 1.90 / 5*<br>1.0* / 2.99 / 5*<br>1.0* / 1.10 / 5* <sup>#</sup>                                                                                                                                                        | 3.3* / 2.28 / 6        | 0.3* / 2.51 / 2*<br>2.0* / 2.72 / 10              | 11.4                  |
| 75 s <sup>b</sup>                           | 1.0* / 2.09 / 5*<br>1.0* / 3.02 / 5*<br>1.0* / 1.11 / 5* <sup>#</sup>                                                                                                                                                        | 3.3* / 2.29 / 5        | 0.3* / 2.61 / 2*<br>2.0* / 2.73 / 8               | 10.2                  |
| 115 s <sup>b</sup>                          | 1.0* / 1.92 / 5*<br>1.0* / 3.00 / 5*<br>1.0* / 1.09 / 5* <sup>#</sup>                                                                                                                                                        | 3.3* / 2.28 / 6        | 0.3* / 2.55 / 2*<br>2.0* / 2.72 / 9               | 13.3                  |
| 269 s <sup>b</sup>                          | 1.0* / 1.88 / 5*<br>1.0* / 2.98 / 5*<br>1.0* / 1.08 / 5* <sup>#</sup>                                                                                                                                                        | 3.3* / 2.28 / 7        | 0.3* / 2.48 / 2*<br>2.0* / 2.71 / 10              | 14.2                  |
| 750 s <sup>b</sup>                          | 1.0* / 1.87 / 5*<br>1.0* / 2.98 / 5*<br>1.0* / 1.07 / 5* <sup>#</sup>                                                                                                                                                        | 3.3* / 2.28 / 7        | 0.3* / 2.49 / 2*<br>2.0* / 2.71 / 10              | 15.0                  |

<sup>a</sup>Data correspond to EXAFS spectra in Fig. 5. N, coordination number; R, interatomic distance; 2σ<sup>2</sup>, Debye-Waller factor; R<sub>F</sub>, error sum calculated for reduced distances of 1-3 Å. <sup>b</sup>Data for averaged spectra of apo-HydA1/[2Fe]<sup>adt</sup> mixtures (Figs. 5A and 5B). Fit restraints: \*fixed parameter, &,§parameter coupled to yield the same value for different shells, #parameters of a multiple-scattering shell of C(N/O) ligands. Distances from crystal structures of the [2Fe]<sup>adt</sup> complex and of [FeFe]-hydrogenase apo or holo (oxidized) protein are given in parentheses [1, 2]. Data in Fig. 6 stem from a similar fit approach as for the mean apo-HydA1 + [2Fe]<sup>adt</sup> spectrum, using a variable or fixed E<sub>0</sub> value in combination with a shorter or longer mean Fe-C(-O/N) bond length in the simulations of the individual EXAFS spectra of the protein/complex mixtures (Fig. S6).

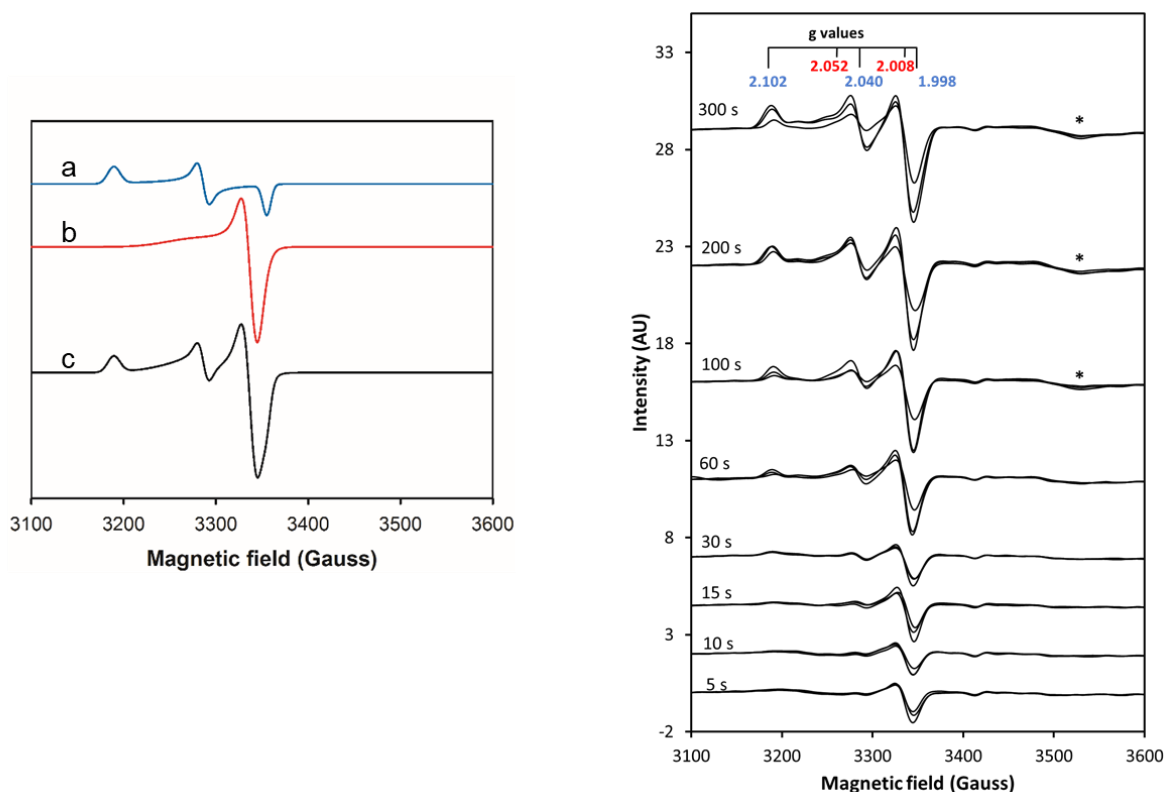

**Fig. S1. Overview of simulated and experimental EPR spectra.** Left panel: Simulated spectra of (a) **Hox**; (b) **Hox-CO**; (c) the total simulation of the spectrum of apo-HydA /  $[2\text{Fe}]^{\text{adt}}$  after an incubation period of 200 seconds by linear combination of spectra in (a) and (b). The relative contributions of the **Hox** and **Hox-CO** EPR signals to the resultant spectrum were found to be 0.47 and 0.53, respectively. (cf. Fig. 2, bottom panel).  $g$ -values used for the simulation: **Hox**:  $g_1=2.102$ ,  $g_2=2.040$ ,  $g_3=1.998$ ; **Hox-CO**:  $g_1=2.052$ ,  $g_2=2.008$ ,  $g_3=2.008$ . The simulation was carried out in EasySpin 5.2 [3], run as a toolbox in Matlab 2016b (the MathWorks, Inc., Natick, Massachusetts). Right panel: H-cluster assembly monitored by EPR spectroscopy. Spectra recorded for mixtures of apo-HydA1 and  $[2\text{Fe}]^{\text{adt}}$  incubated for increasing mixing periods (indicated in the figure). For each time-point three samples were prepared and their respective spectra are overlaid. Reported  $g$ -values for **Hox** (blue) and **Hox-CO** (red) are indicated; a feature at  $g = 1.91$  (asterisks) is attributable to a reduced iron-sulfur cluster (see main text).

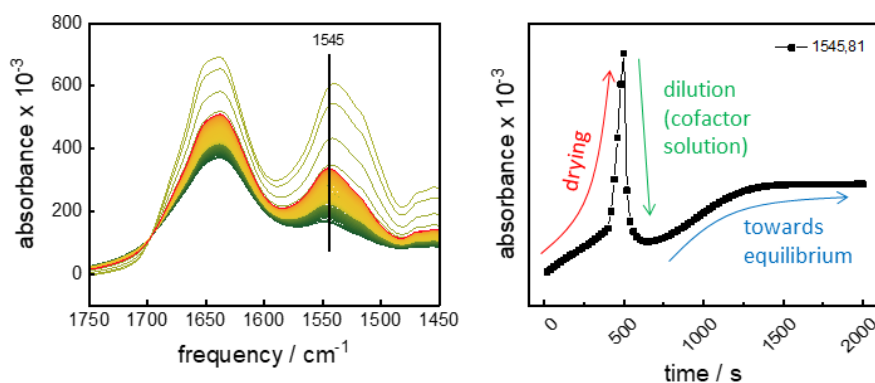

**Fig. S2. Protein film hydration monitored by ATR FTIR spectroscopy.** Left panel: FTIR spectra shown in Fig. 3 and Fig. S4 were normalized according to the amplitude of the amide II protein band at  $1545\text{ cm}^{-1}$ , which varied due to variations in the hydration level of the HydA1 protein film. Right panel: Amplitude of the amide II band during the protein/complex mixing experiment. Increasing film dehydration (drying) prior to  $[2\text{Fe}]^{\text{adt}}$  addition causes an increase in the protein band signals, addition of the  $[2\text{Fe}]^{\text{adt}}$  solution onto the film results in a transient drop of the band amplitudes due to the film hydration, and increasing dehydration at longer incubation periods finally results in constant IR intensities of protein and H-cluster bands.

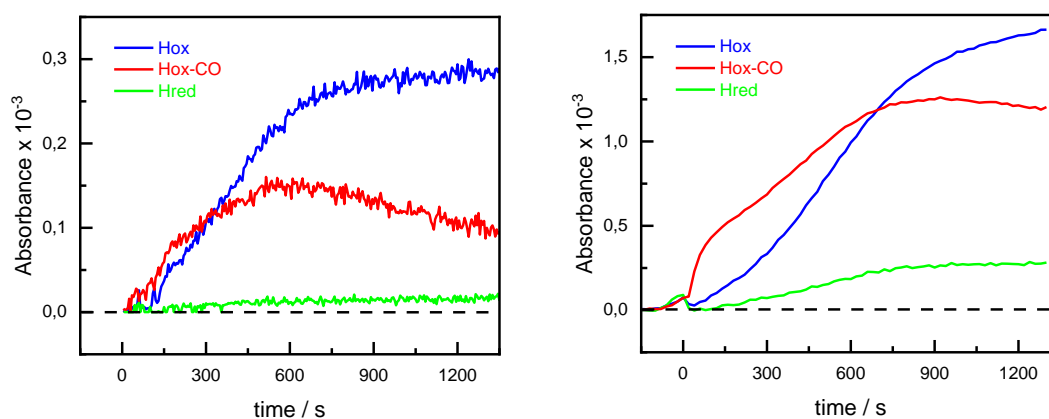

**Fig. S3. Influence of the  $[2\text{Fe}]^{\text{adt}}$  concentration on H-cluster assembly.** Maturation of apo-HydA1 with  $\sim 0.8\text{ }\mu\text{M}$  (left panel) and  $\sim 80\text{ }\mu\text{M}$  (right panel)  $[2\text{Fe}]^{\text{adt}}$  solution. Regardless of  $[2\text{Fe}]^{\text{adt}}$  concentrations the same order of events was observed, i.e. **Hox-CO** formation preceding **Hox** appearance. The overall cofactor formation yield is much larger in the presence of  $\sim 80\text{ }\mu\text{M}$   $[2\text{Fe}]^{\text{adt}}$  solution, but apparent faster **Hox** formation was observed with  $\sim 0.8\text{ }\mu\text{M}$   $[2\text{Fe}]^{\text{adt}}$  solution; (marker bands: **Hox-CO**,  $2012\text{ cm}^{-1}$ ; **Hox**,  $1940\text{ cm}^{-1}$ ; **Hred**,  $1891\text{ cm}^{-1}$ ).

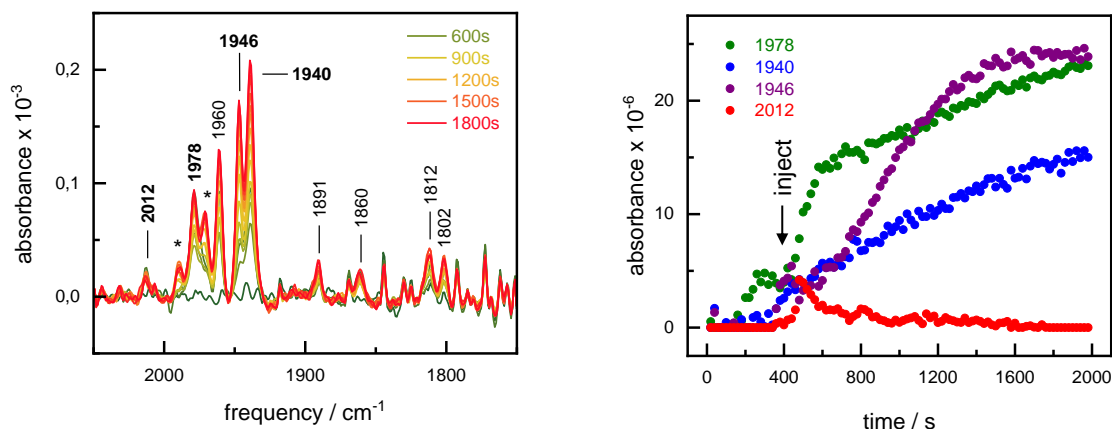

**Fig. S4. H-cluster assembly under reducing conditions.** 78  $\mu\text{M}$   $[\text{2Fe}]^{\text{adt}}$  was added to a film of 500  $\mu\text{M}$  apo-HydA1 (pH 8) in the presence of 1 mM sodium dithionite (DT) and the reaction was monitored by the appearance of H-cluster specific bands in the CO vibrations region. Left panel: FTIR spectra in the CO region at selected mixing periods. Spectra are normalized at the amide II band at  $1545\text{ cm}^{-1}$  (not shown). Sharp bands are assigned to water vapor. Right panel: Appearance of specific H-cluster states as a function of time as derived from respective marker bands in the right panel (**Hox-CO**,  $2012\text{ cm}^{-1}$ ; **Hox**,  $1940\text{ cm}^{-1}$ ; **HoxH**,  $1946\text{ cm}^{-1}$ ; **Hhyd**,  $1978\text{ cm}^{-1}$ ). Bands marked with an asterisk in the left panel (*i.e.*,  $1988$  and  $1971\text{ cm}^{-1}$ ) hint at the existence of **Htrans**.

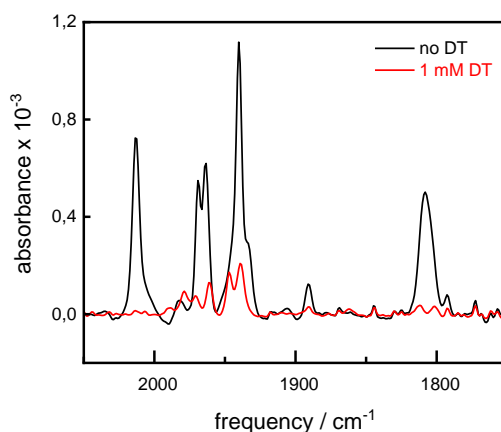

**Fig. S5. Effect of reductant on H-cluster assembly (comparison).** H-cluster assembly efficiency in the presence (red spectrum) or absence (black spectrum) of the reductant sodium dithionite (DT). Spectra were recorded after a apo-HydA1/ $[\text{2Fe}]^{\text{adt}}$  mixing period of 1900 s (Figs. 3 and S4) for identical protein concentrations with or without pre-treatment of the apo-HydA1 film with DT.

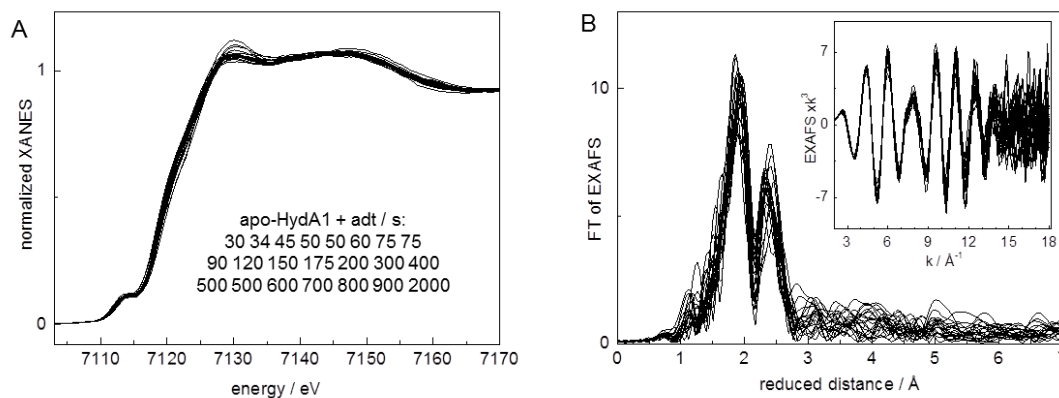

**Fig. S6. Fe XAS spectra of apo-HydA1/[2Fe]<sup>adt</sup> mixtures.** Mixtures were incubated prior to freezing for the indicated approximate time periods. 22 spectra from two series of samples are overlaid. (A) XANES spectra. (B) Fourier-transforms of EXAFS spectra in the inset.

## References

- 1 R. Kositzki, S. Mebs, N. Schuth, N. Leidel, L. Schwartz, M. Karnahl, F. Wittkamp, D. Daunke, A. Grohmann, U.-P. Apfel, F. Gloaguen, S. Ott and M. Haumann (2017) Dalton Trans 46:12544-12557
- 2 J. Esselborn, N. Muraki, K. Klein, V. Engelbrecht, N. Metzler-Nolte, U. P. Apfel, E. Hofmann, G. Kurisu and T. Happe (2016) Chem Sci 7:959-968
- 3 S. Stoll, A. Schweiger (2006) J. Magn. Reson. 178: 42-55
